# Supplementary material
Source: MDPI journal article supplement (https://www.mdpi.com/2673-7167/3/4/26)
Supplement: s1 [file s1]

## **Supplementary Materials**

**Table S1.** Kinetic parameters of protein interactions with conventional ('large') NPs.

| Entry | Nanoparticle         | Size (nm) | Interaction with          | Technique | Surface immobilization | $k_{on} (M^{-1}s^{-1})$ | $k_{off} (s^{-1})$   | $K_D (M)$            | Ref. |
|-------|----------------------|-----------|---------------------------|-----------|------------------------|-------------------------|----------------------|----------------------|------|
| 1     | Liposome-PEG 2k      | 100-150   | Albumin                   | SPR       | NP                     | $1.4 \times 10^5$       | $2.3 \times 10^{-3}$ | $1.6 \times 10^{-8}$ | [83] |
| 2     | Liposome-PEG 2k      | 100-150   | $\alpha 2$ -Macroglobulin | SPR       | NP                     | $3.9 \times 10^4$       | $5.4 \times 10^{-3}$ | $1.4 \times 10^{-7}$ | [83] |
| 3     | Liposome-PEG 2k      | 100-150   | Clusterin                 | SPR       | NP                     | $4.5 \times 10^4$       | $3.2 \times 10^{-3}$ | $7.0 \times 10^{-8}$ | [83] |
| 4     | Liposome-PEG 2k      | 100-150   | Vitronectin               | SPR       | NP                     | $3.8 \times 10^4$       | $2.1 \times 10^{-3}$ | $5.5 \times 10^{-8}$ | [83] |
| 5     | Liposome-PEG 2k      | 100-150   | Ficolin-3                 | SPR       | NP                     | $3.7 \times 10^4$       | $2.1 \times 10^{-1}$ | $6.9 \times 10^{-6}$ | [83] |
| 6     | Liposome-PEG 2k      | 100-150   | CD5L                      | SPR       | NP                     | $2.7 \times 10^5$       | $2.1 \times 10^{-1}$ | $7.6 \times 10^{-7}$ | [83] |
| 7     | Liposome-PEG 2k      | 100-150   | Complement C3             | SPR       | NP                     | $1.1 \times 10^4$       | $3.9 \times 10^{-3}$ | $3.6 \times 10^{-8}$ | [83] |
| 8     | Liposome without PEG | 100-150   | Albumin                   | SPR       | NP                     | $1.1 \times 10^5$       | $2.1 \times 10^{-3}$ | $1.9 \times 10^{-8}$ | [83] |
| 9     | Liposome without PEG | 100-150   | $\alpha 2$ -Macroglobulin | SPR       | NP                     | $5.3 \times 10^4$       | $1.1 \times 10^{-2}$ | $2.1 \times 10^{-7}$ | [83] |
| 10    | Liposome without PEG | 100-150   | Clusterin                 | SPR       | NP                     | $3.5 \times 10^4$       | $4.5 \times 10^{-3}$ | $1.3 \times 10^{-7}$ | [83] |
| 11    | Liposome without PEG | 100-150   | Vitronectin               | SPR       | NP                     | $5.5 \times 10^4$       | $3.8 \times 10^{-3}$ | $7.0 \times 10^{-8}$ | [83] |

|    |                               |         |                  |     |         |                   |                      |                      |      |
|----|-------------------------------|---------|------------------|-----|---------|-------------------|----------------------|----------------------|------|
| 12 | Liposome without PEG          | 100-150 | Ficolin-3        | SPR | NP      | $4.8 \times 10^4$ | $2.4 \times 10^{-1}$ | $5.5 \times 10^{-6}$ | [83] |
| 13 | Liposome without PEG          | 100-150 | CD5L             | SPR | NP      | $2.3 \times 10^5$ | $1.3 \times 10^{-1}$ | $5.7 \times 10^{-7}$ | [83] |
| 14 | NIPAM/BAM                     | 70      | ApoA-I           | SPR | NP      | $3.0 \times 10^4$ | $3.0 \times 10^{-5}$ | $3.0 \times 10^{-5}$ | [85] |
| 15 | NIPAM/BAM                     | 70      | HSA              | SPR | NP      | $2.4 \times 10^3$ | $2.0 \times 10^{-3}$ | $2.0 \times 10^{-3}$ | [85] |
| 16 | NIPAM/BAM                     | 70      | Fibrinogen       | SPR | NP      | $2.0 \times 10^3$ | $2.0 \times 10^{-3}$ | $2.0 \times 10^{-3}$ | [85] |
| 17 | Silica with FBS corona        | 70      | Apolipoprotein H | SPR | NP      | $2.8 \times 10^3$ | $4.8 \times 10^{-2}$ | $1.7 \times 10^{-5}$ | [87] |
| 18 | Polymer NP with plasma corona | 50      | LRP1             | SPR | Protein | -                 | $3.3 \times 10^{-4}$ | -                    | [79] |
| 19 | Polymer NP with plasma corona | 50      | Anti-ApoE        | SPR | Protein | -                 | $4.6 \times 10^{-4}$ | -                    | [79] |
| 20 | Polymer NP with plasma corona | 50      | Anti-HSA         | SPR | Protein | -                 | $1.0 \times 10^{-5}$ | -                    | [79] |
| 21 | Liposome-PA 20%               | 151     | Amyloid- $\beta$ | SPR | Protein | $2.6 \times 10^3$ | $8.6 \times 10^{-5}$ | $3.3 \times 10^{-8}$ | [81] |

|    |                                |      |                  |     |         |                   |                                                   |                                                   |      |
|----|--------------------------------|------|------------------|-----|---------|-------------------|---------------------------------------------------|---------------------------------------------------|------|
| 22 | PA-SLN<br>Solid Lipid NP       | 76   | Amyloid- $\beta$ | SPR | Protein | -                 | $9.0 \times 10^{-3}$<br>$\leq 7.0 \times 10^{-5}$ | $2.2 \times 10^{-6}$<br>$\leq 1.7 \times 10^{-8}$ | [81] |
| 23 | Gold                           | 17   | ApoA-I           | SPR | NP      | $1.8 \times 10^4$ | $1.6 \times 10^{-3}$                              | $1.2 \times 10^{-7}$                              | [82] |
| 24 | Gold                           | 17   | HSA              | SPR | NP      | $4.7 \times 10^2$ | $1.8 \times 10^{-3}$                              | $4.9 \times 10^{-6}$                              | [82] |
| 25 | Gold                           | 17   | Fibrinogen       | SPR | NP      | $3.8 \times 10^3$ | $2.0 \times 10^{-3}$                              | $5.3 \times 10^{-7}$                              | [82] |
| 26 | Gold                           | 17   | IgG              | SPR | NP      | $2.3 \times 10^2$ | $2.3 \times 10^{-3}$                              | $1.0 \times 10^{-5}$                              | [82] |
| 27 | TiO <sub>2</sub>               | 3.5  | Fibrinogen       | SPR | NP      | $3.7 \times 10^6$ | $7.6 \times 10^{-4}$                              | $2.1 \times 10^{-10}$                             | [78] |
| 28 | TiO <sub>2</sub>               | 3.5  | HSA              | SPR | NP      | $9.5 \times 10^3$ | $9.8 \times 10^{-4}$                              | $1.0 \times 10^{-7}$                              | [78] |
| 29 | Al <sub>2</sub> O <sub>3</sub> | 13.5 | Fibrinogen       | SPR | NP      | $4.3 \times 10^4$ | $7.2 \times 10^{-4}$                              | $1.7 \times 10^{-8}$                              | [78] |
| 30 | Al <sub>2</sub> O <sub>3</sub> | 13.6 | HSA              | SPR | NP      | $1.0 \times 10^3$ | $1.0 \times 10^{-3}$                              | $9.8 \times 10^{-7}$                              | [78] |
| 31 | CeO <sub>2</sub>               | 13   | Fibrinogen       | SPR | NP      | $5.1 \times 10^6$ | $2.2 \times 10^{-4}$                              | $4.2 \times 10^{-11}$                             | [78] |

|                  |                  |    |                    |     |         |                   |                      |                      |      |
|------------------|------------------|----|--------------------|-----|---------|-------------------|----------------------|----------------------|------|
| 32               | CeO <sub>2</sub> | 13 | HSA                | SPR | NP      | $1.8 \times 10^4$ | $6.8 \times 10^{-4}$ | $3.9 \times 10^{-8}$ | [78] |
| 33 <sup>II</sup> | Citrate gold NPs | 5  | $\alpha$ Rep (G8)  | SPR | Protein | $1.6 \times 10^6$ | $2.9 \times 10^{-3}$ | $1.8 \times 10^{-9}$ | [88] |
| 34 <sup>II</sup> | Citrate gold NPs | 5  | $\alpha$ Rep (F5)  | SPR | Protein | $1.5 \times 10^6$ | $5.7 \times 10^{-3}$ | $3.8 \times 10^{-9}$ | [88] |
| 35 <sup>II</sup> | Citrate gold NPs | 5  | $\alpha$ Rep (A12) | SPR | Protein | $1.6 \times 10^6$ | $5.1 \times 10^{-3}$ | $3.2 \times 10^{-9}$ | [88] |
| 36 <sup>II</sup> | Citrate gold NPs | 5  | $\alpha$ Rep (D7)  | SPR | Protein | $2.1 \times 10^6$ | $5.0 \times 10^{-3}$ | $2.4 \times 10^{-9}$ | [88] |
| 37 <sup>II</sup> | Citrate gold NPs | 5  | $\alpha$ Rep (D5)  | SPR | Protein | $1.9 \times 10^6$ | $3.3 \times 10^{-3}$ | $1.7 \times 10^{-9}$ | [88] |
| 38               | Gold NPs         | 20 | IgG                | SPR | Protein | -                 | $2.6 \times 10^{-3}$ | -                    | [89] |
| 39               | Gold NPs         | 20 | Transferrin        | SPR | Protein | -                 | $3.6 \times 10^{-3}$ | -                    | [89] |
| 40               | Gold NPs         | 20 | HSA                | SPR | Protein | -                 | $5.5 \times 10^{-3}$ | -                    | [89] |
| 41               | Silver NPs       | 30 | IgG                | SPR | Protein | -                 | $1.4 \times 10^{-3}$ | -                    | [89] |

|                 |                                     |     |                                                     |                                   |         |                   |                      |                      |       |
|-----------------|-------------------------------------|-----|-----------------------------------------------------|-----------------------------------|---------|-------------------|----------------------|----------------------|-------|
| 42              | Silver NPs                          | 30  | Transferrin                                         | SPR                               | Protein | -                 | $1.5 \times 10^{-3}$ | -                    | [89]  |
| 43              | Silver NPs                          | 30  | HSA                                                 | SPR                               | Protein | -                 | $1.6 \times 10^{-3}$ | -                    | [89]  |
| 44              | Polymer-coated FePt                 | 5.6 | HSA                                                 | Time-resolved fluoresc. quenching | -       | $2.4 \times 10^3$ | $9.0 \times 10^{-3}$ | $3.8 \times 10^{-6}$ | [84]  |
| 45              | NIPAM/BAM (85:15)                   | 200 | HSA                                                 | Size exclusion chromatography     | -       | -                 | $4.0 \times 10^{-4}$ | -                    | [6]   |
| 46              | Polystyrene                         | 100 | Lysozyme                                            | Differential dynamic microscopy   | -       | $5.2 \times 10^4$ | $5.2 \times 10^{-2}$ | $1.0 \times 10^{-6}$ | [119] |
| 47 <sup>#</sup> | Latex particles                     | 80  | B1 binding domain of <i>Streptococcal</i> protein G | Stopped-flow spectroscopy         | -       | -                 | $3.8 \times 10^{-1}$ | -                    | [86]  |
| 48              | Lipid nanoparticles                 | 90  | Liver fatty acid binding proteins                   | Time-resolved fluoresc. quenching | -       | -                 | $7.1 \times 10^{-1}$ | -                    | [61]  |
| 49              | Lipid nanoparticles                 | 90  | Liver fatty acid binding proteins                   | Time-resolved fluoresc. quenching | -       | -                 | $1.4 \times 10^{-2}$ | -                    | [61]  |
| 50 <sup>†</sup> | Gold coated with poly(acrylic acid) | 7   | Fibrinogen                                          | Manual-mixing technique           | -       | $4.4 \times 10^4$ | $2.7 \times 10^{-4}$ | $6.1 \times 10^{-9}$ | [54]  |
| 51 <sup>†</sup> | Gold coated with poly(acrylic acid) | 10  | Fibrinogen                                          | Manual-mixing technique           | -       | $2.5 \times 10^4$ | $1.1 \times 10^{-4}$ | $4.2 \times 10^{-9}$ | [54]  |

|                     |                                     |     |                          |                                    |   |                   |                      |                      |      |
|---------------------|-------------------------------------|-----|--------------------------|------------------------------------|---|-------------------|----------------------|----------------------|------|
| 52 <sup>†</sup>     | Gold coated with poly(acrylic acid) | 15  | Fibrinogen               | Manual-mixing technique            | - | $2.5 \times 10^4$ | $5.8 \times 10^{-5}$ | $2.3 \times 10^{-9}$ | [54] |
| 53 <sup>†</sup>     | Gold coated with poly(acrylic acid) | 17  | Fibrinogen               | Manual-mixing technique            | - | $1.9 \times 10^4$ | $3.3 \times 10^{-5}$ | $1.7 \times 10^{-9}$ | [54] |
| 54 <sup>†</sup>     | Gold coated with poly(acrylic acid) | 19  | Fibrinogen               | Manual-mixing technique            | - | $1.4 \times 10^4$ | $2.2 \times 10^{-5}$ | $1.6 \times 10^{-9}$ | [54] |
| 55 <sup>†</sup>     | Gold coated with poly(acrylic acid) | 22  | Fibrinogen               | Manual-mixing technique            | - | $1.1 \times 10^4$ | $1.7 \times 10^{-5}$ | $1.5 \times 10^{-9}$ | [54] |
| 56 <sup>&amp;</sup> | Sulfonated polystyrene NPs          | 100 | Transferrin / plasma 5%  | Fluoresc. correlation spectroscopy | - | -                 | $6.4 \times 10^{-4}$ | -                    | [77] |
| 57 <sup>&amp;</sup> | Sulfonated polystyrene NPs          | 100 | Transferrin / plasma 10% | Fluoresc. correlation spectroscopy | - | -                 | $1.4 \times 10^{-3}$ | -                    | [77] |
| 58 <sup>&amp;</sup> | Carboxylated polystyrene NPs        | 100 | Transferrin / plasma 5%  | Fluoresc. correlation spectroscopy | - | -                 | $1.7 \times 10^{-2}$ | -                    | [77] |

|| Experiments in Entries 33 to 37 involved quantifying the interactions of artificial  $\alpha$ -helical repeat proteins, which were generated in a phage display system, with citrate-stabilized gold NPs.

# In Entry 47, the stopped-flow data were analyzed using a model that considers four rate constants: adsorption rate ( $18 \text{ M}^{-1}\text{s}^{-1}$ ), desorption rate ( $8.2 \text{ s}^{-1}$ ), unfolding rate ( $k_u = 2.24 \text{ s}^{-1}$ ), and refolding rate ( $0.38 \text{ s}^{-1}$ ). Only  $k_{\text{off}}$  was entered into the Table, and it was assigned the value  $0.38 \text{ s}^{-1}$ .

† Entries 50 to 55 utilized manual-mixing in combination with NP centrifugation and fluorescence readings of the supernatant to determine  $k_{\text{off}}$  and  $K_D$  values. The  $k_{\text{on}}$  was subsequently calculated as  $k_{\text{on}} = k_{\text{off}}/K_D$ .

& Experiments in Entries 56 to 58 involved evaluating the dissociation rate constant of pre-adsorbed transferrin coronas on NP surfaces through competitive displacement with plasma at concentrations of 5 or 10%.

**Table S2.** Kinetic parameters of protein interactions with ultrasmall NPs.

| Entry | Nanoparticle <sup>&amp;</sup> | Size (nm) <sup>\$</sup> | Interaction with | Technique <sup>#</sup> | $k_{on}$ (M <sup>-1</sup> s <sup>-1</sup> ) | $k_{off}$ (s <sup>-1</sup> ) <sup>‡</sup>                                              | $K_D$ (M)                                    | NaCl (M) <sup>*</sup> | Ref.  |
|-------|-------------------------------|-------------------------|------------------|------------------------|---------------------------------------------|----------------------------------------------------------------------------------------|----------------------------------------------|-----------------------|-------|
| 1     | AuMBA                         | 2                       | Thrombin         | SPR                    | $2.0 \times 10^6$                           | $6.2 \times 10^{-2}$                                                                   | $3.1 \times 10^{-8}$                         | 0.15                  | [103] |
| 2     | AuGSH                         | 2                       | Thrombin         | SPR                    | $2.8 \times 10^4$                           | $5.0 \times 10^{-1}$                                                                   | $1.9 \times 10^{-5}$                         | 0.15                  | [103] |
| 3     | AuMBA                         | 2                       | Thrombin         | Stopped-flow           | $6.0 \times 10^7$                           | $5.0 \times 10^{-2}$<br>$2.0 \times 10^{-1}$<br>$1.8 \times 10^0$                      | -                                            | 0.15                  | [103] |
| 4     | AuGSH                         | 2                       | Thrombin         | Stopped-flow           | -                                           | $1.4 \times 10^{-1}$<br>$6.4 \times 10^{-1}$<br>$7.9 \times 10^0$                      | -                                            | 0.15                  | [103] |
| 5     | AuMBA                         | 2                       | CrataBL          | SPR                    | $4.4 \times 10^5$<br>$2.9 \times 10^5$      | $1.5 \times 10^{-2}$<br>$3.8 \times 10^{-1}$                                           | $3.5 \times 10^{-8}$<br>$1.7 \times 10^{-6}$ | 0.15                  | [73]  |
| 6     | AuGSH                         | 2                       | CrataBL          | SPR                    | $1.7 \times 10^4$                           | $3.8 \times 10^{-1}$                                                                   | $2.7 \times 10^{-5}$                         | 0.15                  | [73]  |
| 7     | AuMBA                         | 2                       | CrataBL          | SPR                    | $2.2 \times 10^5$                           | $6.4 \times 10^{-1}$                                                                   | $2.9 \times 10^{-6}$                         | 0.4                   | [73]  |
| 8     | AuGSH                         | 2                       | CrataBL          | SPR                    | $8.1 \times 10^2$                           | $1.8 \times 10^{-1}$                                                                   | $2.2 \times 10^{-4}$                         | 0.4                   | [73]  |
| 9†    | AuMBA                         | 2                       | Ubiquitin        | Stopped-flow           | $5.1 \times 10^7$                           | $2.0 \times 10^1$<br>$2.8 \times 10^0$<br>$5.4 \times 10^{-1}$<br>$7.7 \times 10^{-2}$ | $1.0 \times 10^{-7}$                         | 0.005                 | [96]  |



|                  |                                        |     |              |              |                                        |                                                                                           |                                              |      |       |
|------------------|----------------------------------------|-----|--------------|--------------|----------------------------------------|-------------------------------------------------------------------------------------------|----------------------------------------------|------|-------|
| 10 <sup>†</sup>  | AuMBA                                  | 2   | Ubiquitin    | Stopped-flow | $4.3 \times 10^7$                      | $2.0 \times 10^{-1}$<br>$2.7 \times 10^0$<br>$5.0 \times 10^{-1}$<br>$7.0 \times 10^{-2}$ | -                                            | 0.02 | [96]  |
| 11 <sup>†</sup>  | AuMBA                                  | 2   | Ubiquitin    | Stopped-flow | $2.7 \times 10^7$                      | $2.0 \times 10^{-1}$<br>$2.5 \times 10^0$<br>$4.5 \times 10^{-1}$<br>$6.6 \times 10^{-2}$ | -                                            | 0.05 | [96]  |
| 12               | AuMBA                                  | 2   | Ubiquitin    | Stopped-flow | -                                      | $2.6 \times 10^{-1}$<br>$3.1 \times 10^0$<br>$5.5 \times 10^{-1}$<br>$7.3 \times 10^{-2}$ | -                                            | 0.15 | [96]  |
| 13               | AuMBA                                  | 2   | Ubiquitin    | Stopped-flow | -                                      | $2.9 \times 10^{-1}$<br>$3.4 \times 10^0$<br>$5.6 \times 10^{-1}$<br>$7.2 \times 10^{-2}$ | -                                            | 0.3  | [96]  |
| 14               | AuECYN                                 | 2   | Thrombin     | SPR          | $1.6 \times 10^6$                      | $2.1 \times 10^{-1}$                                                                      | $1.3 \times 10^{-7}$                         | 0.15 | [104] |
| 15               | AuMBA                                  | 2   | FXIIa        | SPR          | $5.0 \times 10^5$                      | $1.0 \times 10^{-1}$                                                                      | $2.0 \times 10^{-7}$                         | 0.15 | [106] |
| 16               | AuMBA                                  | 2   | Cytochrome c | SPR          | $8.6 \times 10^5$                      | $6.0 \times 10^{-1}$                                                                      | $7.2 \times 10^{-7}$                         | 0.15 | [99]  |
| 17 <sup>  </sup> | Gold NPs decorated with tweezer motifs | 2   | Survivin     | SPR          | $1.8 \times 10^5$<br>$1.7 \times 10^2$ | $1.3 \times 10^{-1}$<br>$1.2 \times 10^{-4}$                                              | $7.0 \times 10^{-7}$<br>$7.0 \times 10^{-7}$ | 0.15 | [110] |
| 18 <sup>  </sup> | Gold NPs decorated with tweezer motifs | 2   | Survivin     | SPR          | $5.1 \times 10^2$                      | $6.1 \times 10^{-4}$                                                                      | $1.2 \times 10^{-6}$                         | 0.15 | [110] |
| 19 <sup>  </sup> | Gold NPs (control)                     | 2   | Survivin     | SPR          | $6.3 \times 10^2$                      | $5.0 \times 10^{-3}$                                                                      | $8.0 \times 10^{-6}$                         | 0.15 | [110] |
| 20               | CdTe@TGA                               | 2.6 | HSA          | SPR          | $6.9 \times 10^6$                      | $7.6 \times 10^{-2}$                                                                      | $1.1 \times 10^{-8}$                         | 0.15 | [80]  |

|    |          |     |     |     |                   |                      |                      |      |      |
|----|----------|-----|-----|-----|-------------------|----------------------|----------------------|------|------|
| 21 | CdTe@MPA | 3.0 | HSA | SPR | $4.4 \times 10^6$ | $6.9 \times 10^{-2}$ | $1.6 \times 10^{-8}$ | 0.15 | [80] |
|----|----------|-----|-----|-----|-------------------|----------------------|----------------------|------|------|

---

& AuMBA, AuGSH, and AuECYN refer to NPs coated with *p*-mercaptobenzoic acid, glutathione, and the peptide ECYN, respectively.

\$ The size of an ultrasmall NP can be reported in terms of its core diameter or total hydrodynamic diameter. The former can be typically assessed by electron microscopy, while the latter can be assessed by techniques such as dynamic light scattering (DLS), differential centrifugal sedimentation, and DOSY-1H NMR. Due to the variation in measurement methods and the reporting of size, most sizes listed in the table were approximated as 2 nm.

# In all SPR experiments, the protein was surface immobilized. For all stopped-flow analyses, fitting of the stopped-flow traces resulted in multiple  $k_{\text{off}}$  values, preventing the calculation of a single  $K_D$ . Additionally, with the exception of Entry 3, all stopped-flow analyses revealed a complex mechanism of NP-protein association involving intermediate reaction steps.

† In Entry 9, the  $K_D$  was determined by fluorescence quenching titration; in Entries 9-11, the  $k_{\text{on}}$  was estimated from  $k_{\text{on}} = k_2/K_1$  in the stopped-flow analysis.

|| In Entries 17 to 19,  $K_D$  and  $k_{\text{off}}$  values were estimated from Figure 8 within ref. [110], and  $k_{\text{on}}$  values were calculated as  $k_{\text{on}} = k_{\text{off}}/K_D$ .

‡ Stopped-flow analysis of usNPs resulted in multiple  $k_{\text{off}}$  values, but only the  $k_{\text{off}}$  value with the larger corresponding amplitude is plotted in Figure 4 within the main text.

\* Kinetic measurements of usNP interactions with CrataBL and ubiquitin were performed at various salt concentrations, but only data for 150 and 5 mM NaCl (for CrataBL and ubiquitin, respectively) are plotted in Figure 4 within the main text.

**Table S3.** Kinetic parameters of serum and plasma interactions with conventional NPs.

| Entry | Nanoparticle      | Size (nm) | Interaction with | Technique <sup>†</sup>  | $k_{\text{off}}$ (s <sup>-1</sup> )             | $K_D$ (M)                                        | Incubation time (min)* | Ref. |
|-------|-------------------|-----------|------------------|-------------------------|-------------------------------------------------|--------------------------------------------------|------------------------|------|
| 1     | NIPAM/BAM (85:15) | 70        | Plasma           | SPR                     | $3.7 \times 10^{-4}$<br>$6.1 \times 10^{-5}$    | -                                                | 30                     | [6]  |
| 2     | NIPAM/BAM (50:50) | 70        | Plasma           | SPR                     | $2.0 \times 10^{-3}$<br>$3.4 \times 10^{-5}$    | -                                                | 30                     | [6]  |
| 3     | Gold              | 50        | Serum            | Biolayer interferometry | $7.4 \times 10^{-3}$<br>$1.7 \times 10^{-4}$    | $8.83 \times 10^{-6}$<br>$3.43 \times 10^{-3}$   | 10                     | [69] |
| 4     | Gold              | 50        | Serum            | Biolayer interferometry | $7.4 \times 10^{-3}$<br>$6.2 \times 10^{-5}$    | $2.73 \times 10^{-6}$<br>$7.76 \times 10^{-9}$   | 20                     | [69] |
| 5     | Gold              | 50        | Serum            | Biolayer interferometry | $1.8 \times 10^{-3}$<br>$< 1.0 \times 10^{-7}$  | $2.35 \times 10^{-7}$<br>$< 1.0 \times 10^{-12}$ | 40                     | [69] |
| 6     | Gold              | 50        | Serum            | Biolayer interferometry | $7.61 \times 10^{-4}$<br>$< 1.0 \times 10^{-7}$ | $1.91 \times 10^{-7}$<br>$< 1.0 \times 10^{-12}$ | 60                     | [69] |
| 7     | Gold              | 50        | Serum            | Biolayer interferometry | $3.4 \times 10^{-4}$<br>$< 1.0 \times 10^{-7}$  | $1.63 \times 10^{-7}$<br>$< 1.0 \times 10^{-12}$ | 120                    | [69] |
| 8     | Liposomes         | 100       | Serum            | Biolayer interferometry | $2.67 \times 10^{-2}$<br>$5.35 \times 10^{-4}$  | $2.75 \times 10^{-5}$<br>$3.54 \times 10^{-6}$   | 10                     | [69] |
| 9     | Liposomes         | 100       | Serum            | Biolayer interferometry | $1.78 \times 10^{-2}$<br>$3.10 \times 10^{-4}$  | $2.25 \times 10^{-5}$<br>$2.36 \times 10^{-6}$   | 20                     | [69] |

|                 |                                  |     |       |                                 |                                              |                                                |     |       |
|-----------------|----------------------------------|-----|-------|---------------------------------|----------------------------------------------|------------------------------------------------|-----|-------|
| 10              | Liposomes                        | 100 | Serum | Biolayer interferometry         | $1.5 \times 10^{-2}$<br>$3.6 \times 10^{-4}$ | $5.58 \times 10^{-5}$<br>$4.05 \times 10^{-6}$ | 40  | [69]  |
| 11              | Liposomes                        | 100 | Serum | Biolayer interferometry         | $9.1 \times 10^{-3}$<br>$2.1 \times 10^{-4}$ | $3.28 \times 10^{-5}$<br>$2.38 \times 10^{-6}$ | 60  | [69]  |
| 12              | Liposomes                        | 100 | Serum | Biolayer interferometry         | $6.0 \times 10^{-3}$<br>$1.4 \times 10^{-5}$ | $3.0 \times 10^{-6}$<br>$1.6 \times 10^{-6}$   | 120 | [69]  |
| 13 <sup>#</sup> | PS NPs with labeled serum corona | 100 | Serum | Differential dynamic microscopy | $2.4 \times 10^{-4}$                         | -                                              | -   | [119] |

† Both SPR and biolayer interferometry experiments were conducted with immobilized NPs. Additionally, in both experiments, the obtained data were best fit assuming two modes of interactions representing weakly and strongly binding proteins.

\* Values of the dissociation rate constants were determined after the indicated incubation time between NPs and serum/plasma.

# In Entry 13, the polystyrene NPs were pre-coated with a labeled serum protein corona. The pre-coated NPs were injected into zebrafish larvae, and the dissociation of the labeled corona was monitored by differential dynamic microscopy.  $k_{\text{off}}$  was estimated as  $1/\tau_{\text{desorption}}$  from the reported value of  $\tau_{\text{desorption}}$ .
